# Supplementary material
Source: ML conference proceedings conference paper supplement (https://proceedings.mlr.press/v54/abbasi-yadkori17a.html)
Supplement: Supplementary file 1 [file abbasi-yadkori17a-supp.pdf]

## A Proofs

*Proof of Lemma 8.* We continue the proof.

**Case 1.2,**  $|x_2 - d| > |x_2 - b|$ :

**Case 1.2.1,**  $|c - x_1| \leq |x_2 - d|$ : We have that  $|x_2 - b| < |x_1 - b| \leq R_\epsilon |x_1 - c|$ . Thus,

$$\begin{aligned} \frac{A}{B} &\geq \frac{|a - b| |x_1 - x_2|}{BR_\epsilon |a - x_1| |x_1 - c|} \\ &= \frac{|a - b|}{R_\epsilon |a - x_1|} \cdot \frac{|d - x_2|}{|c - d|} \geq \frac{|d - x_2|}{R_\epsilon |c - d|} \\ &\geq \frac{|d - x_2|}{R_\epsilon (|d - x_2| + |x_2 - x_1| + |x_1 - c|)} \\ &\geq \frac{|d - x_2|}{R_\epsilon (|d - x_2| + (1 + R_\epsilon) |x_1 - c|)} \\ &= \frac{1}{R_\epsilon \left(1 + (1 + R_\epsilon) \frac{|x_1 - c|}{|d - x_2|}\right)} \geq \frac{1}{R_\epsilon (2 + R_\epsilon)} \\ &\geq \frac{1}{4R_\epsilon (1 + 2R_\epsilon)}. \end{aligned}$$

**Case 1.2.2,**  $|c - x_1| > |x_2 - d|$ : As before, we bound  $A$  and  $B$  separately:

$$\begin{aligned} B &\leq \frac{|c - d| |x_1 - x_2|}{|c - x_1| |x_2 - b|} \\ &\leq \frac{|x_1 - x_2|}{|x_2 - b|} \cdot \frac{|c - x_1| + R_\epsilon |c - x_1| + |x_2 - d|}{|c - x_1|} \\ &\leq (2 + R_\epsilon) \frac{|x_1 - x_2|}{|x_2 - b|}, \end{aligned}$$

and

$$A = \frac{|b - a| |x_1 - x_2|}{|a - x_1| |x_2 - b|} \geq \frac{|x_1 - x_2|}{|x_2 - b|}.$$

Putting these together,

$$\frac{A}{B} \geq \frac{1}{2 + R_\epsilon} \geq \frac{1}{4R_\epsilon (1 + 2R_\epsilon)},$$

where the second inequality holds because  $R_\epsilon (1 + 8R_\epsilon) \geq 2/3$ .

**Case 2,**  $|x_1 - b| > |x_1 - a|$  **and**  $|x_2 - b| < |x_2 - a|$ : In this case,  $x_1$  and  $x_2$  are on opposite sides of the point  $(a + b)/2$ . Let  $M$  be a positive constant. We will choose  $M = 4$  later.

**Case 2.1,**  $|c - d| \leq M |c - x_1|$ : We bound

$$B \leq \frac{M |x_1 - x_2|}{|x_2 - d|} \leq \frac{MR_\epsilon |x_1 - x_2|}{|x_2 - b|}$$

and conclude

$$\frac{A}{B} \geq \frac{|a - b|}{MR_\epsilon |a - x_1|} \geq \frac{1}{MR_\epsilon} \geq \frac{1}{4R_\epsilon (1 + 2R_\epsilon)}.$$

**Case 2.2,**  $|c - d| > M |c - x_1|$ :

**Case 2.2.1,**  $|c - d| \leq M |a - b|$ : We have that

$$\frac{A}{B} \geq \frac{1}{MR_\epsilon^2} \geq \frac{1}{4R_\epsilon (1 + 2R_\epsilon)}.$$

**Case 2.2.2,**  $|c - d| > M |a - b|$ : Let  $x_0$  be a point on the line segment  $[x_1, x_2]$ . Let  $\beta_1$  be the angle between line segments  $[c, x_1]$  and  $[x_1, x_0]$ . We write

$$|c - x_0|^2 = |x_1 - x_0|^2 + |x_1 - c|^2 - 2 |x_1 - c| \cdot |x_1 - x_0| \cos \beta_1$$

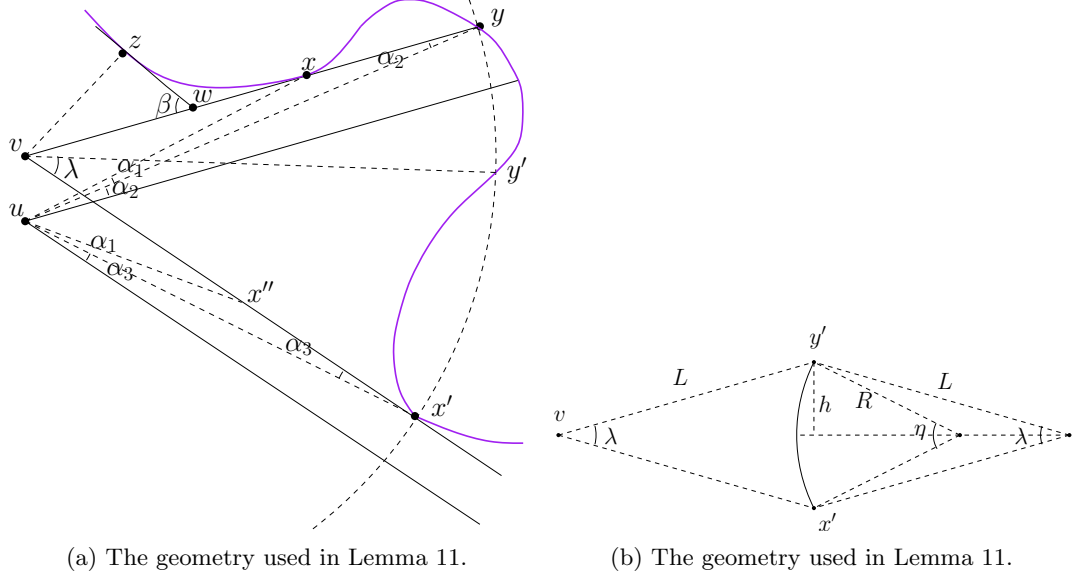

Figure 4: If two points are close to each other, they have similar views.

$$\begin{aligned}
 &\leq \frac{1}{M^2} |c - d|^2 + \frac{1}{M^2} |c - d|^2 + \frac{2}{M^2} |c - d|^2 \\
 &= \frac{4}{M^2} |c - d|^2 .
 \end{aligned}$$

By the triangle inequality,

$$|d - x_0| \geq |c - d| - |c - x_0| \geq \left(1 - \frac{2}{M}\right) |c - d| .$$

Let  $\beta_2$  be the angle between line segments  $[d, x_2]$  and  $[x_2, x_0]$ . Let  $w = 1 - 2/M$ . We write

$$\begin{aligned}
 w^2 |c - d|^2 &\leq |d - x_0|^2 \\
 &= |x_2 - x_0|^2 + |x_2 - d|^2 - 2 |x_2 - d| \cdot |x_2 - x_0| \cos \beta_2 \\
 &\leq \frac{1}{M^2} |c - d|^2 + |x_2 - d|^2 + \frac{2}{M} |d - x_2| \cdot |c - d| .
 \end{aligned}$$

Thus,

$$|x_2 - d|^2 + \frac{2}{M} |d - x_2| \cdot |c - d| + \left(\frac{4}{M} - \frac{3}{M^2} - 1\right) |c - d|^2 \geq 0 ,$$

which is a quadratic inequality in  $|x_2 - d|$ . Thus it holds that

$$|x_2 - d| \geq \left(-\frac{1}{M} + \left|\frac{2}{M} - 1\right|\right) |c - d| .$$

If we choose  $M = 4$ , then  $|x_2 - d| \geq 0.25 |c - d|$  and

$$B \leq \frac{4 |x_1 - x_2|}{|x_1 - c|} \leq \frac{4R_\epsilon |x_1 - x_2|}{|x_1 - a|} ,$$

yielding

$$\frac{A}{B} \geq \frac{|a - b|}{4R_\epsilon |b - x_2|} \geq \frac{1}{4R_\epsilon} \geq \frac{1}{4R_\epsilon(1 + 2R_\epsilon)} .$$

Finally, observe that Case 3 follows by symmetry from Case 1. □

*Proof of Lemma 11.* We say a line segment  $L$  is not fully visible from a point  $x$  if there exists a point on the line segment that is not visible from  $x$ . We denote this event by  $L \notin \text{VIEW}(x)$ . Let  $L$  be a line segment chosen by HIT-AND-RUN from  $u$ . So, as the next point in the Markov chain, HIT-AND-RUN chooses a point uniformly at random from  $L$ . We know that

$$P_u(\{x : x \notin \text{VIEW}(v)\}) \leq P_u(\{L : L \notin \text{VIEW}(v)\}),$$

So it suffices to show

$$P_u(\{L : L \notin \text{VIEW}(v)\}) \leq \max\left(\frac{4}{\pi}, \frac{\kappa}{\sin(\pi/8)}\right) \frac{\epsilon'}{\epsilon}. \quad (7)$$

To sample the line segment  $L$ , first we sample a random two dimensional plane containing  $u$  and  $v$ , and then sample the line segment inside this plane. To prove (7), we show that in any two dimensional plane containing  $u$  and  $v$ , the ratio of invisible to visible region is bounded by  $\max\left(\frac{4}{\pi}, \frac{\kappa}{\sin(\pi/8)}\right) \frac{\epsilon'}{\epsilon}$ .

Consider the geometry shown in Figure 4(a). Let  $\mathcal{H}$  be the intersection of  $\partial\Sigma$  and a two dimensional plane containing  $u$  and  $v$ . For a line  $\ell$  and points  $q$  and  $u$ , we write  $[q, \ell, u]$  to denote that  $u$  and a small neighborhood of  $q$  on  $\mathcal{H}$  are on the opposite sides of  $\ell$ . For example, in Figure 4(a), we have that  $[x, \ell(v, x), u]$ . Define a subset

$$Q = \{q \in \mathcal{H} : \ell(v, q) \text{ is tangent to } \mathcal{H} \text{ at } q \text{ and } [q, \ell(v, q), u]\}.$$

Any line  $\ell(v, q)$  such that  $[q, \ell(v, q), u]$  creates some space that is visible to  $u$  and invisible to  $v$ . If  $Q$  is empty, then the entire  $\mathcal{H}$  is in the view of  $v$  and  $P_u(\{x : x \notin \text{VIEW}(v)\}) = 0$ . Otherwise, let  $x$  be a member of  $Q$ . Let  $y \in \mathcal{H}$  be the closest point to  $x$  such that  $[y, v]$  is tangent to  $\mathcal{H}$  at  $x$ . Let  $\alpha_1$  be the angle between  $[x, u]$  and  $[u, y]$ , and let  $\alpha_2$  be the angle between  $[y, v]$  and  $[y, u]$ . Because  $|u - v| \leq |v - z| \leq |v - x|$ ,  $\alpha_1 + \alpha_2 \leq \pi/2$ . Further, if the lengths of  $|u - v|$  and  $|v - x|$  are fixed,  $\alpha_1 + \alpha_2$  is maximized when  $[v, u]$  is orthogonal to  $[u, x]$ . If  $x$  is the only member of  $Q$ , then maximum invisible angle is  $\alpha_1$ , which can be bounded as follows:

$$\sin \alpha_1 \leq \sin(\alpha_1 + \alpha_2) \leq \frac{|u - v|}{|v - x|} \leq \frac{|u - v|}{\epsilon}.$$

Otherwise, assume  $Q$  has more members. The same upper bound holds for members that are also on the line  $\ell(v, x)$ . So next we consider members of  $Q$  that are not on the line  $\ell(v, x)$ . Assume  $Q$  has only one such member and let  $x'$  be that tangent point (see Figure 4(a). The same argument can be repeated if  $Q$  has more such members). We consider two cases. **Case 1:**  $|v - x'| \geq |v - y|$ . Let  $\alpha_3$  be the angle between  $[v, x']$  and  $[u, x']$ . If  $\alpha_3 \leq \alpha_2$ , then

$$\sin(\alpha_1 + \alpha_3) \leq \sin(\alpha_1 + \alpha_2) \leq \frac{|u - v|}{\epsilon}.$$

Otherwise,  $\alpha_3 > \alpha_2$ . Consider point  $x''$  such that the angle between  $[u, x']$  and  $[u, x'']$  is  $\alpha_1$ . We show that  $|v - x''| \geq |v - x|$  by contradiction. Assume  $|v - x| > |v - x''|$ . Thus,  $|x' - x''| > |y - x|$  and  $|u - x| > |u - x''|$ . By law of sines,  $|x - y| / \sin \alpha_1 = |u - x| / \sin \alpha_2$  and  $|x'' - x'| / \sin \alpha_1 = |u - x''| / \sin \alpha_3$ . Because  $|u - x| > |u - x''|$  and  $\alpha_3 > \alpha_2$ , we have that  $|u - x| / \sin \alpha_2 > |u - x''| / \sin \alpha_3$ , and thus  $|x'' - x'| / \sin \alpha_1 < |x - y| / \sin \alpha_1$ . This implies  $|x'' - x'| < |x - y|$ , a contradiction. Thus,

$$\sin(\alpha_1 + \alpha_3) \leq \frac{|u - v|}{|v - x''|} \leq \frac{|u - v|}{|v - x|} \leq \frac{|u - v|}{\epsilon}.$$

Next we consider the second case. **Case 2:**  $|v - x'| < |v - y|$ . Consider the arc on  $\mathcal{H}$  from  $y$  to  $x'$ . Let  $y'$  be the last point on this arc such that  $|v - y'| = |v - y|$ . Let  $\eta$  be the change of angle between the tangent of  $\mathcal{H}$  at  $y'$  and the tangent of  $\mathcal{H}$  at  $x'$  (tangents are defined in clockwise direction), and let  $\lambda$  be the angle between  $[v, y']$  and  $[v, x']$ . Angle  $\eta$  is minimized when the tangent at  $y'$  is orthogonal to  $[v, y']$ . Thus  $\eta \geq \pi/2 - \lambda$ . If  $\lambda < \pi/4$ , then  $\eta \geq \pi/4$ . Angle  $\lambda$  is smallest when the arc from  $y'$  to  $x'$  changes with maximum curvature  $\kappa/\mathcal{R}_{\mathcal{H}}$ , i.e. it is a segment of a circle with radius  $\mathcal{R}_{\mathcal{H}}/\kappa$ . Figure 4(b) shows this case, where  $R = \mathcal{R}_{\mathcal{H}}/\kappa$  and  $L = |v - y'|$ . We have that

$$\frac{\sin(\lambda/2)}{\sin(\eta/2)} \geq \frac{h/L}{h/R} = \frac{R}{L} = \frac{\mathcal{R}_{\mathcal{H}}}{\kappa |v - y|}$$

Thus,

$$\frac{\lambda}{2} \geq \sin(\lambda/2) \geq \frac{\mathcal{R}_{\mathcal{H}}}{\kappa |v - y|} \sin(\eta/2) = \frac{\sin(\pi/8)\mathcal{R}_{\mathcal{H}}}{\kappa |v - y|} \geq \frac{\sin(\pi/8)}{\kappa},$$

where the last step follows by  $|v - y| \leq \mathcal{R}_{\mathcal{H}}$ . Thus

$$\lambda \geq \lambda_0 \stackrel{\text{def}}{=} \min \left( \frac{\pi}{4}, \frac{\sin(\pi/8)}{\kappa} \right).$$

So for every  $|u - v|/\epsilon$  invisible region, we have at least  $\lambda_0$  visible region. Thus,

$$P_u(\{x : x \notin \text{VIEW}(v)\}) \leq \frac{|u - v|}{\lambda_0 \epsilon} = \max \left( \frac{4}{\pi}, \frac{\kappa}{\sin(\pi/8)} \right) \frac{|u - v|}{\epsilon}.$$

□

Before proving Lemma 12, we show a useful inequality. Consider points  $u, v, w \in \Sigma$  that see each other. Let  $\mathcal{C}$  be the convex hull of

$$\{a(u, v), b(u, v), a(u, w), b(u, w), a(v, w), b(v, w)\}.$$

Let  $i$  and  $j$  be distinct members of  $\{u, v, w\}$ . We use  $a'(i, j)$  and  $b'(i, j)$  to denote the endpoints of  $\ell_{\mathcal{C}}(i, j)$  that are closer to  $i$  and  $j$ , respectively. Because  $|a'(i, j) - b'(i, j)|$  is convex combination of two line segments that are inside  $\Sigma$ ,

$$|a'(i, j) - b'(i, j)| \leq D_{\Sigma}. \quad (8)$$

Also  $[a(i, j), b(i, j)] \subset [a'(i, j), b'(i, j)]$ , and thus  $|a(i, j) - i| \leq |a'(i, j) - i|$  and  $|b(i, j) - j| \leq |b'(i, j) - j|$ . We can write

$$\begin{aligned} \ell_{\mathcal{C}}(i, j) &= \frac{|i - j| \cdot |a'(i, j) - b'(i, j)|}{|a'(i, j) - i| \cdot |j - b'(i, j)|} \\ &\leq \frac{|i - j| \cdot |a(i, j) - b(i, j)|}{|a(i, j) - i| \cdot |j - b(i, j)|} \cdot \frac{|a'(i, j) - b'(i, j)|}{|a(i, j) - b(i, j)|} \\ &\leq D_{\Sigma} \frac{\ell_{\Sigma}(i, j)}{d(i, \partial\Sigma)}, \end{aligned} \quad (9)$$

where the last inequality holds because  $|a(i, j) - b(i, j)| \geq d(i, \partial\Sigma)$ .

*Proof of Lemma 12.* Let  $A \subset \Sigma$  be a measurable subset of  $\Sigma$ . We prove that

$$P_u(A) - P_v(A) \leq 1 - \frac{\epsilon}{8e^4 D_{\Sigma}}.$$

We partition  $A$  into five subsets, and estimate the probability of each of them separately:

$$\begin{aligned} A_1 &= \{x \in A : |x - u| < F(u)\}, \\ A_2 &= \left\{ x \in A : |(x - u)^{\top}(u - v)| > \frac{1}{\sqrt{n}} |x - u| \cdot |u - v| \right\}, \\ A_3 &= \left\{ x \in A : |x - u| < \frac{1}{6} |u - a(u, x)|, \right. \\ &\quad \left. \text{or } |x - u| < \frac{1}{6} |u - a(x, u)| \right\}, \\ A_4 &= \{x \in A : x \in \text{VIEW}(u), x \notin \text{VIEW}(v)\}, \\ S &= A \setminus A_1 \setminus A_2 \setminus A_3 \setminus A_4. \end{aligned}$$

The definition of  $F(u)$  immediately yields  $P_u(A_1) \leq 1/8$ . Now consider  $A_2$  and let  $C$  be the cap of the unit sphere centered at  $u$  in the direction of  $v$ , defined by  $C = \{x : (u - v)^{\top}x \geq \frac{1}{\sqrt{n}}|u - v|\}$ . If  $x \sim P_u$ , then  $P(x \in A_2)$  is bounded above by the probability that a uniform random line through  $u$  intersects  $C$ , which has probability equal to the ratio between the surface of  $C$  and the surface of the half-sphere. A standard computation to show

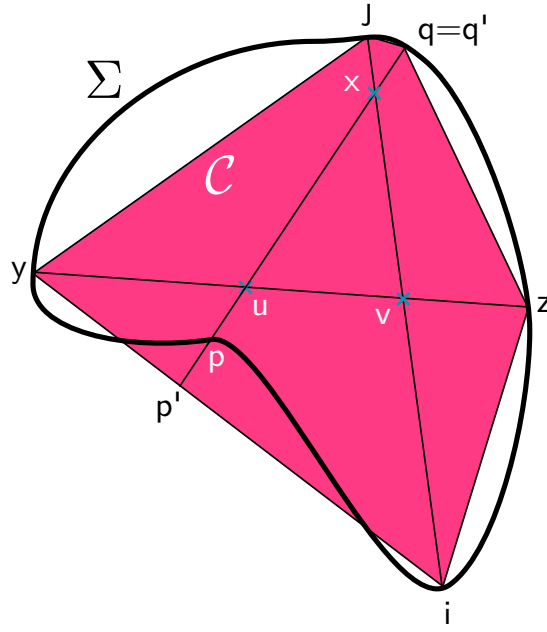

Figure 5: Illustration for Lemma 12 proof

that this ratio is less than  $1/6$ , and hence  $P_u(A_2) \leq 1/6$ . The probability that  $x \in A_3$  is at most  $1/6$ , since  $x$  is chosen from a segment of a chord of length at most  $|\ell(u, x)|/6$ . Finally, to bound  $P(A_4)$ , we apply Lemma 11:

$$P_u(x \in A : x \in \text{VIEW}(u), x \notin \text{VIEW}(v)) \leq \max\left(\frac{4}{\pi}, \frac{\kappa}{\sin(\pi/8)}\right) \frac{\epsilon'}{\epsilon} \leq \frac{1}{6}.$$

The combined probability of  $A_1, A_2, A_3$ , and  $A_4$  is at most  $1/8 + 1/6 + 1/6 + 1/6 < 3/4$ .

We now turn to bounding  $P_u(S)$  and show that  $P_u(S) \leq 2e^4(D_\Sigma/\epsilon)P_v(S)$ . Because points in  $S$  are visible from both  $u$  and  $v$ , by (2)

$$P_v(S) = \frac{2}{n\pi_n} \int_S \frac{1}{\ell_\Sigma(v, x) |x - v|^{n-1}}.$$

Now, any  $x \in S$  must respect the following

$$|x - u| \geq F(u) \geq \frac{\sqrt{n}}{2} |u - v|, \quad (10)$$

$$|(x - u)^\top(u - v)| \leq \frac{1}{\sqrt{n}} |x - u| \cdot |u - v|, \quad (11)$$

$$|x - u| \geq \frac{1}{6} |u - a(u, x)|, \text{ and} \quad (12)$$

$$|x - u| \geq \frac{1}{6} |u - a(x, u)|. \quad (13)$$

As illustrated in Figure 5, we define the points  $y = a(u, v)$ ,  $z = a(v, u)$ ,  $p = a(u, x)$ ,  $q = a(x, u)$ ,  $i = a(v, x)$  and  $j = a(x, v)$  with convex hull  $\mathcal{C}$ . Also let  $p'$  and  $q'$  be the endpoints of  $\ell_{\mathcal{C}}(u, x)$ . If  $p' = p$  and  $q' = q$ , we proceed with the argument in the proof of Lemma 9 of Lovász (1999) to get the desired result. Otherwise, assume  $q' = q$  and  $p'$  is the intersection of the lines  $\ell(u, p)$  and  $\ell(y, i)$ . (See Figure 5. A similar argument holds when  $q \neq q'$ .) From (12) and (13), we get that

$$2|x - u| > \frac{1}{6} |p - q|.$$

We have that  $|p - q| \geq \epsilon$ , and by (8),  $|p' - q'| \leq D_\Sigma$ . Thus  $|p' - q'| \leq (D_\Sigma/\epsilon) |p - q|$ . Thus,

$$\frac{1}{6} |p' - q'| \leq \frac{2D_\Sigma}{\epsilon} |x - u|. \quad (14)$$

To relate  $P_v(S)$  to  $P_u(S)$ , we need to bound  $|x - v|$  and  $\ell(x, v)$  in terms of  $|x - u|$  and  $\ell(x, u)$ :

$$\begin{aligned}
 |x - v|^2 &= |x - u|^2 + |u - v|^2 + 2(x - u)^\top(u - v) \\
 &\leq |x - u|^2 + |u - v|^2 + \frac{2}{\sqrt{n}} |x - u| \cdot |u - v| && \dots \text{By (11)} \\
 &\leq |x - u|^2 + \frac{4}{n} |x - u|^2 + \frac{4}{n} |x - u|^2 && \dots \text{By (10)} \\
 &= \left(1 + \frac{8}{n}\right) |x - u|^2 .
 \end{aligned}$$

Thus,

$$|x - v| \leq \left(1 + \frac{4}{n}\right) |x - u| . \quad (15)$$

First we use convexity of  $\mathcal{C}$  to bound  $\ell_{\mathcal{C}}(x, v)$  in terms of  $\ell_{\mathcal{C}}(x, u)$ , and then we use (9) to bound  $\ell_{\Sigma}(x, v)$  and  $\ell_{\Sigma}(x, u)$  in terms of  $\ell_{\mathcal{C}}(x, v)$  and  $\ell_{\mathcal{C}}(x, u)$ . By Menelaus' Theorem (wrt triangle  $uvx$  and transversal line  $[y, i]$ ),

$$\frac{|x - i|}{|v - i|} = \frac{|u - y|}{|v - y|} \cdot \frac{|x - p'|}{|u - p'|} .$$

We have that

$$\frac{|u - y|}{|v - y|} = 1 - \frac{|v - u|}{|v - y|} > 1 - d_{\mathcal{C}}(u, v) ,$$

and thus

$$\begin{aligned}
 \frac{|x - v|}{|v - i|} &= \frac{|x - i|}{|v - i|} - 1 \\
 &\geq (1 - d_{\mathcal{C}}(u, v)) \frac{|x - p'|}{|u - p'|} - 1 \\
 &= \frac{|x - u|}{|u - p'|} \left(1 - d_{\mathcal{C}}(u, v) \frac{|x - p'|}{|x - u|}\right) \\
 &> \frac{|x - u|}{|u - p'|} \left(1 - d_{\mathcal{C}}(u, v) \frac{|p' - q'|}{|x - u|}\right) \\
 &> \frac{|x - u|}{|u - p'|} \left(1 - \frac{12D_{\Sigma}\epsilon}{24D_{\Sigma}\epsilon}\right) \\
 &> \frac{1}{2} \frac{|x - u|}{|u - p'|} ,
 \end{aligned}$$

where we have used (14) and  $d_{\mathcal{C}}(u, v) = d_{\Sigma}(u, v) < \epsilon/(24D_{\Sigma})$  (the condition in the statement of the lemma); we conclude that

$$|v - i| < 2 \frac{|x - v|}{|x - u|} |u - p'| . \quad (16)$$

Next we prove a similar inequality for  $|v - j|$ . It is easy to check that

$$\frac{|z - v|}{|u - z|} = 1 - \frac{|u - v|}{|u - z|} > 1 - d_{\mathcal{C}}(u, v) ,$$

and combining with Menelaus' Theorem

$$\frac{|v - j|}{|x - j|} = \frac{|q' - u|}{|x - q'|} \cdot \frac{|z - v|}{|u - z|}$$

we can show

$$\frac{|x - v|}{|x - j|} = \frac{|v - j|}{|x - j|} - 1$$

$$\begin{aligned}
 &\geq (1 - d_{\mathcal{C}}(u, v)) \frac{|q' - u|}{|x - q'|} - 1 \\
 &= \frac{|x - u|}{|x - q'|} \left( 1 - d_{\mathcal{C}}(u, v) \frac{|q' - u|}{|x - u|} \right) \\
 &> \frac{|x - u|}{|x - q'|} \left( 1 - d_{\mathcal{C}}(u, v) \frac{|p' - q'|}{|x - u|} \right) \\
 &> \frac{|x - u|}{|x - q'|} \left( 1 - \frac{12D_{\Sigma}\epsilon}{24D_{\Sigma}\epsilon} \right) \\
 &> \frac{1}{2} \frac{|x - u|}{|x - q'|},
 \end{aligned}$$

where we have used (14) and  $d_{\mathcal{C}}(u, v) = d_{\Sigma}(u, v) < \epsilon/(24D_{\Sigma})$ . Thus,

$$|x - j| < 2 \frac{|x - v|}{|x - u|} |x - q'|,$$

and combining this with the trivial observation that  $|x - v| \leq 2 \frac{|x - v|}{|x - u|} |x - u|$ , and Equation 16 yields

$$\ell_{\mathcal{C}}(x, v) = |v - i| + |v - x| + |x - j| \leq 2 \frac{|x - v|}{|x - u|} \ell_{\mathcal{C}}(x, u).$$

Thus,

$$\begin{aligned}
 \ell_{\Sigma}(x, v) &= \ell_{\mathcal{C}}(x, v) \\
 &\leq 2 \frac{|x - v|}{|x - u|} \ell_{\mathcal{C}}(x, u) \\
 &\leq \frac{2D_{\Sigma}}{\epsilon} \frac{|x - v|}{|x - u|} \ell_{\Sigma}(x, u).
 \end{aligned} \tag{17}$$

Where the last step holds by (9). Now we are ready to lower bound  $P_v(S)$  in terms of  $P_u(S)$ .

$$\begin{aligned}
 P_v(S) &= \frac{2}{n\pi_n} \int_S \frac{dx}{\ell_{\Sigma}(x, v) |x - v|^{n-1}} \\
 &\geq \frac{\epsilon}{n\pi_n D_{\Sigma}} \int_S \frac{|x - u| dx}{\ell_{\Sigma}(x, u) |x - v|^n} && \dots \text{By (17)} \\
 &\geq \frac{\epsilon}{n\pi_n D_{\Sigma}} \left(1 + \frac{4}{n}\right)^{-n} \int_S \frac{dx}{\ell_{\Sigma}(x, u) |x - u|^{n-1}} && \dots \text{By (15)} \\
 &\geq \frac{\epsilon}{2e^4 D_{\Sigma}} P_u(S).
 \end{aligned}$$

Finally,

$$\begin{aligned}
 P_u(A) - P_v(A) &\leq P_u(A) - P_v(S) \\
 &\leq P_u(A) - \frac{\epsilon}{2e^4 D_{\Sigma}} P_u(S) \\
 &\leq P_u(A) - \frac{\epsilon}{2e^4 D_{\Sigma}} \left( P_u(A) - \frac{3}{4} \right) \\
 &= \frac{3\epsilon}{8e^4 D_{\Sigma}} + \left( 1 - \frac{\epsilon}{2e^4 D_{\Sigma}} \right) P_u(A) \\
 &\stackrel{(a)}{\leq} \frac{3\epsilon}{8e^4 D_{\Sigma}} + 1 - \frac{4\epsilon}{8e^4 D_{\Sigma}} \\
 &= 1 - \frac{\epsilon}{8e^4 D_{\Sigma}}.
 \end{aligned}$$

In the step (a), we used the fact that  $D_{\Sigma} \geq \epsilon$  and  $P_u(A) \leq 1$ . □

*Proof of Lemma 13.* Let  $\{S_1, S_2\}$  be a partitioning of  $\Sigma$ . Define

$$\begin{aligned}\Sigma_1 &= \{x \in S_1 : P_x(S_2) \leq \delta\}, \\ \Sigma_2 &= \{x \in S_2 : P_x(S_1) \leq \delta\}, \\ \Sigma_3 &= \Sigma \setminus \Sigma_1 \setminus \Sigma_2.\end{aligned}$$

**Case 1:**  $\text{VOL}(\Sigma_1) \leq \text{VOL}(S_1)/2$ . We have that

$$\int_{S_1} P_x(S_2) dx \geq \int_{S_1 \setminus \Sigma_1} P_x(S_2) dx \geq \delta \text{VOL}(S_1 \setminus \Sigma_1) \geq \frac{\delta}{2} \text{VOL}(S_1).$$

Thus,

$$\frac{1}{\min\{\text{VOL}(S_1), \text{VOL}(S_2)\}} \int_{S_1} P_x(S_2) dx \geq \frac{\delta}{2}.$$

**Case 2:**  $\text{VOL}(\Sigma_1) > \text{VOL}(S_1)/2$  and  $\text{VOL}(\Sigma_2) > \text{VOL}(S_2)/2$ . Similar to the argument in the previous case,

$$\int_{S_1} P_x(S_2) \geq \delta \text{VOL}(S_1 \setminus \Sigma_1),$$

and

$$\int_{S_1} P_x(S_2) = \int_{S_2} P_x(S_1) \geq \delta \text{VOL}(S_2 \setminus \Sigma_2).$$

Thus,

$$\int_{S_1} P_x(S_2) \geq \frac{\delta}{2} \text{VOL}(\Sigma \setminus \Sigma_1 \setminus \Sigma_2) = \frac{\delta}{2} \text{VOL}(\Sigma_3).$$

Let  $\Omega_i = g^{-1}(\Sigma_i)$  for  $i = 1, 2, 3$ . Define

$$(u(x), v(x)) = \underset{u \in \Omega_1, v \in \Omega_2, \{u, v, x\} \text{ are collinear}}{\text{argmin}} d_\Omega(u, v), \quad h(x) = (1/3) \min(1, d_\Omega(u(x), v(x))).$$

By definition,  $h(x)$  satisfies condition of Theorem 7. Let  $\epsilon = \frac{\tau}{2n}$  and notice that  $\text{VOL}(\Omega^\epsilon) \geq \text{VOL}(\Omega)/2$ . We have that

$$\begin{aligned}\int_{S_1} P_x(S_2) &\geq \frac{\delta}{2} \text{VOL}(\Omega_3) \\ &\geq \frac{\delta}{2} \mathbf{E}_\Omega(h(x)) \min(\text{VOL}(\Omega_1), \text{VOL}(\Omega_2)) \\ &= \frac{\delta}{4} \mathbf{E}_{\Omega^\epsilon}(h(x)) \min(\text{VOL}(\Sigma_1), \text{VOL}(\Sigma_2)).\end{aligned}$$

Let  $x \in \Omega^\epsilon$ . We consider two cases. In the first case,  $|u(x) - v(x)| \geq \epsilon/10$ . Thus,

$$d_\Omega(u(x), v(x)) \geq \frac{4}{D_\Omega} |u(x) - v(x)| \geq \frac{2}{5nD_\Omega}.$$

In the second case,  $|u(x) - v(x)| < \epsilon/10$ , then  $|u(x) - x| \leq \epsilon/10$  and  $|v(x) - x| \leq \epsilon/10$ . Thus,  $u, v \in \Omega^{\epsilon'}$  for  $\epsilon' = 9\epsilon/10$ . Thus by Assumption 2,  $g(u), g(v) \in \Sigma^{\epsilon''}$  for  $\epsilon'' = 9\epsilon/(10L_\Omega)$ . By Lemma 10,

$$d_\Omega(u(x), v(x)) \geq \frac{\tilde{d}_\Sigma(g(u(x)), g(v(x)))}{4L_\Sigma^2 L_\Omega^2 R_{\epsilon'}(1 + 2R_{\epsilon'})}.$$

Next we lower bound  $\tilde{d}_\Sigma(g(u), g(v))$ . If  $g(u)$  and  $g(v)$  cannot see each other, then  $\tilde{d}_\Sigma(g(u), g(v)) \geq 8\epsilon''/D_\Sigma$ . Next we assume that  $g(u)$  and  $g(v)$  see each other. Because  $g(u) \in \Sigma_1$  and  $g(v) \in \Sigma_2$ ,

$$d_{tv}(P_{g(u)} - P_{g(v)}) \geq 1 - P_{g(u)}(S_2) - P_{g(v)}(S_1) \geq 1 - 2\delta = 1 - \frac{\epsilon''}{8e^4 D_\Sigma}.$$

Lemma 12, applied to  $g(u), g(v) \in \Sigma^{\epsilon''}$ , gives us that

$$d_\Sigma(g(u), g(v)) \geq \frac{\epsilon''}{24D_\Sigma} \quad \text{or} \quad |g(u) - g(v)| \geq \frac{2}{\sqrt{n}} \min\left(\frac{2F(g(u))}{\sqrt{n}}, G\epsilon''\right).$$

By (6),  $F(g(u)) \geq \epsilon''/16$ . We get the desired lower bound by taking a minimum over all cases.  $\square$
